# Supplementary material for: Experimental population modification of the malaria vector mosquito, Anopheles stephensi
Source: PubMed Central journal article supplement (PMC6922335; doi:10.1371/journal.pgen.1008440), 2019-12-19
Supplement: pgen.1008440.s023.pdf [file pgen.1008440.s023.pdf]

Table S23: NHEJ allele sequences in non-overlapping gene-drive cage trials

| WT     |                                                                                  | Frame | Hom   | Het   |
|--------|----------------------------------------------------------------------------------|-------|-------|-------|
| A1-G3  | GCGGGCAGCGGATGGTTCGGTCTACGGGCAGGGCATGAACGCGGGCTTTGAAGACTGTAGC                    | FS    | 1/2   |       |
|        | GCGGGCAGCGGATGGTTCGGTCTACAGGGCAGGGCATGAACGCGGGCTTTGAAGACTGTAGC*                  | FS    |       | 1/2   |
|        | GCGGGCAGCGGATGGTTCGGTCTACGGAACAGGGCAGGGCATGAACGCGGGCTTTGAAGACTGTAGC              | IF    |       | 1/2   |
| A1-G7  | GCGGGCAGCGGATGGTTCGG-----GCAGGGCATGAACGCGGGCTTTGAAGACTGTAGC                      | FS    | 5/7   |       |
|        | GCGGGCAGCGGATGGTTCGGTCTACG (ins473bp) GGCAGGGCATGAACGCGGGCTTTGAAGACTGTAGC**      | FS    | 2/7   |       |
| A1-G10 | GCGGGCAGCGGATGAAC-----GCAGGGCATGAACGCGGGCTTTGAAGACTGTAGC                         | FS    | 6/8   | 1/8   |
|        | GCGGGCAGCGGATGGTTCGGTTC---GCAGGGCATGAACGCGGGCTTTGAAGACTGTAGC                     | IF    | 1/8   |       |
| A1-G13 | GCGGGCAGCGGATGGTTCGGTCTACG (ins473bp) GGCAGGGCATGAACGCGGGCTTTGAAGACTGTAGC**      | FS    |       | 6/9   |
|        | GCGGGCAGCGGATGAAC-----GCAGGGCATGAACGCGGGCTTTGAAGACTGTAGC                         | FS    |       | 5/9   |
| A3-G5  | GCGGGCAGCGGATGGTTCGGTCTACAGGAACGTTTAC-GGCAGGGCATGAACGCGGGCTTTGAAGACTGTAGC        | FS    | 1/4   | 1/4   |
|        | GCGGGCAGCGGATGGTTCGGTCTACCATCATCAGGGCAGGGCATGAACGCGGGCTTTGAAGACTGTAGC            | FS    | 2/4   | 1/4   |
| A3-G6  | GCGGGCAGCGGATGGTTCGGTCTGGCCGTGGCAGGGCATGAACGCGGGCTTTGAAGACTGTAGC                 | FS    |       | 1/1   |
|        | GCGGGCAGCGGATGGTTCGGTCTACGAGGCAGGGCATGAACGCGGGCTTTGAAGACTGTAGC*                  | FS    |       | 1/1   |
| A3-G7  | GCGGGCAGCGGATGGTTCGGTCTACCATCATCAGGGCAGGGCATGAACGCGGGCTTTGAAGACTGTAGC            | FS    |       | 1/1   |
|        | GCGGGCAGCGGATGGTTCGGTCTACAAGGAACAGGGCAGGGCATGAACGCGGGCTTTGAAGACTGTAGC            | FS    |       | 1/1   |
| A3-G7  | GCGGGCAGCGGATGGTTCGGTCTACGAGGCAGGGCATGAACGCGGGCTTTGAAGACTGTAGC                   | FS    |       | 5/5   |
|        | GCGGGCAATCATCGGATCATCGGA-----GTAGC                                               | FS    |       | 5/5   |
| B1-G4  | GCGGGCAGCGGATGGTTCGGTCTACG (ins473bp) GGCAGGGCATGAACGCGGGCTTTGAAGACTGTAGC**      | FS    | 2/3   |       |
|        | GCGGGCAGCGGATGGTTCGGTCTACA-----GCATGAACGCGGGCTTTGAAGACTGTAGC                     | IF    | 1/3   |       |
| B1-G5  | GCGGGCAGCGGATGGTTCGGTCTACG (ins473bp) GGCAGGGCATGAACGCGGGCTTTGAAGACTGTAGC        | FS    | 1/1   |       |
| B1-G7  | GCGGGCAGCGGATGGTTCGGTCTAC-----AGGGCATGAACGCGGGCTTTGAAGACTGTAGC*                  | FS    |       | 9/9   |
|        | GCGGGCAGCGGATGGTTCGGTCTACAGGGCAGGGCATGAACGCGGGCTTTGAAGACTGTAGC                   | FS    |       | 2/9   |
|        | GCGGGCAGCGGATGGTTCGGTCTACGATGAACGATGGCAGGGCATGAACGCGGGCTTTGAAGACTGTAGC           | IF    |       | 3/9   |
|        | GCGGGCAGCGGATGGTTCGGTCTACGTAACGATGGCAGGGCATGAACGCGGGCTTTGAAGACTGTAGC             | FS    |       | 1/9   |
|        | GCGGCATGCCCTGC-----GGCAGGGCATGAACGCGGGCTTTGAAGACTGTAGC*                          | FS    |       | 3/9   |
| B1-G10 | GCGGGCAGCGGATGGTTCGGTCTAC-----AGGGCATGAACGCGGGCTTTGAAGACTGTAGC                   | FS    | 16/16 |       |
| B2-G7  | GCGGCATGCCCTGC-----GGCAGGGCATGAACGCGGGCTTTGAAGACTGTAGC*                          | FS    | 2/2   |       |
| B2-G10 | GCGGGCAGCGGATGGTTCGGTTC---GGCAGGGCATGAACGCGGGCTTTGAAGACTGTAGC*                   | IF    |       | 12/14 |
|        | GCGGGCAGCGGATGGTTCGGTCTGTCCGGCAGGGCATGAACGCGGGCTTTGAAGACTGTAGC                   | FS    |       | 10/14 |
|        | GCGGGCAGCGGATGGTTCGGTCTCGGGCAGGGCATGAACGCGGGCTTTGAAGACTGTAGC                     | FS    |       | 2/14  |
|        | GCGGGCAGCGGATGGTTCGGTCTACGAGGGCAGGGCATGAACGCGGGCTTTGAAGACTGTAGC                  | FS    |       | 2/14  |
|        | GCGGGCAGCGGATGGTTCGGTTC-----CGTTCCAGCGGATGAACGCGGGCTTTGAAGACTGTAGC               | IF    |       | 2/14  |
| B2-G11 | GCGGGCAGCGGATGGTTCGGTCTACAGGAACGGAACCC--GCAGGGCATGAACGCGGGCTTTGAAGACTGTAGC       | FS    | 1/2   | 1/2   |
|        | GCGGGCAGCGGATGGTTCGGTCTA--GGCAGGGCATGAACGCGGGCTTTGAAGACTGTAGC                    | FS    |       | 1/2   |
| B3-G4  | GCGGGCAGCGGATGGTTCGGTCTAC-----AGGGCATGAACGCGGGCTTTGAAGACTGTAGC*                  | FS    | 1/2   |       |
| B3-G5  | GCGGGCAGCGGATGGTTCGGTCTACAGTACA-GGCAGGGCATGAACGCGGGCTTTGAAGACTGTAGC              | FS    | 4/4   |       |
| B3-G6  | GCGGGCAGCGGATGGTTCGGTCTACAGTACA-GGCAGGGCATGAACGCGGGCTTTGAAGACTGTAGC              | FS    |       | 4/4   |
|        | GCGGGCAGCGGATGGTTCGGTCTACGTTCCGGCAGGGCATGAACGCGGGCTTTGAAGACTGTAGC                | FS    |       | 4/4   |
| B3-G7  | GCGGGCAGCGGATGGTTCGGTCTACAGTACA-GGCAGGGCATGAACGCGGGCTTTGAAGACTGTAGC              | FS    |       | 10/23 |
|        | GCGGGCAGCGGATGGTTCGGTCTATGGCACGCGATGGTTCGAT--GGCAGGGCATGAACGCGGGCTTTGAAGACTGTAGC | FS    |       | 9/23  |
|        | GCGGGCAGCGGATGGTTCGGTTC---GGCAGGGCATGAACGCGGGCTTTGAAGACTGTAGC*                   | IF    | 2/23  | 16/23 |
|        | GCGGGCAGCGGATGGTTCGGTCTACATGAACGC-GGCAGGGCATGAACGCGGGCTTTGAAGACTGTAGC            | FS    |       | 2/23  |
|        | GCGGGCAGCGGATGGTTCGGTCTACATTCGA-GGCAGGGCATGAACGCGGGCTTTGAAGACTGTAGC              | FS    |       | 1/23  |
|        | GCGGGCAGCGGATGGTTCGGTCTAC-----AGGGCATGAACGCGGGCTTTGAAGACTGTAGC                   | FS    |       | 3/23  |
|        | GCGGGCAGCGGATGGTTCGGTCTATGGCAGGGCATGAACGCGGGCTTTGAAGACTGTAGC                     | IF    |       | 1/23  |
| B3-G10 | GCGGGCAGCGGATGGTTCGGTTC---GGCAGGGCATGAACGCGGGCTTTGAAGACTGTAGC                    | IF    | 2/12  | 3/12  |
|        | GCGGGCAGCGGATGGTTCGGTCTAC-----GGGCATGAACGCGGGCTTTGAAGACTGTAGC                    | FS    |       | 6/12  |
|        | GCGGGCAGCGGATGGTTCGGTCTACATTCGC-GGCAGGGCATGAACGCGGGCTTTGAAGACTGTAGC              | FS    |       | 6/12  |
|        | GCGGGCAGCGGATGAAC-----GCAGGGCATGAACGCGGGCTTTGAAGACTGTAGC                         | FS    | 1/12  |       |
|        | GCGGGCAGCGGATGGTTCGGTCTACGGTTCGC-GCAGGGCATGAACGCGGGCTTTGAAGACTGTAGC              | FS    |       | 3/12  |
| C1-G7  | GCGGGCAGCGGATGGTTCGG-----GCAGGGCATGAACGCGGGCTTTGAAGACTGTAGC                      | FS    | 1/4   |       |
| C1-G11 | GCGGGCAGCGGATGGTTCGGTTC---GGCAGGGCATGAACGCGGGCTTTGAAGACTGTAGC                    | FS    | 4/7   |       |
| C1-G13 | GCGGGCAGCGGATGGTTCGGTCTAC-----AGGGCATGAACGCGGGCTTTGAAGACTGTAGC*                  | FS    |       | 1/3   |
|        | GCGGGCAGCGGATGGTTCGGTCTA--GGCAGGGCATGAACGCGGGCTTTGAAGACTGTAGC                    | FS    | 1/3   | 1/3   |

|        |                                                                               |    |      |      |
|--------|-------------------------------------------------------------------------------|----|------|------|
|        | GCGGCGCACGCGATGGTTCGGTTC-----AGGGCATGAACGCGGGCTTTGAAGACTGTAGC                 | FS |      | 1/3  |
|        | GCGGCGCACGCGATGGTTCGGTTCCTACCAT-----ACGCGGGCTTTGAAGACTGTAGC                   | FS |      | 1/3  |
| C2-G7  | GCGGCGCACGCGATGGTTCGGTTCCTACCTTCGGGCGAGGCATGAACGCGGGCTTTGAAGACTGTAGC          | FS | 1/1  |      |
| C2-G10 | GCGGCGCACGCGATGGTTCGGTTCCTA--GGCAGGGCATGAACGCGGGCTTTGAAGACTGTAGC              | FS | 4/4  |      |
| C2-G13 | GCGGCGCACGCGATGGTTCGGTTCCTAC-----AGGGCATGAACGCGGGCTTTGAAGACTGTAGC*            | FS | 1/9  | 1/9  |
|        | GCGGCGCACGCGATGGTTCGGTTCCTACG-CATGCGAGGCATGAACGCGGGCTTTGAAGACTGTAGC           | FS | 2/9  | 6/9  |
|        | GCGGCGCACGCGATGGTTCGGTTCCTACCAT-----ACGCGGGCTTTGAAGACTGTAGC                   | FS |      | 1/9  |
|        | GCGGCGCACGCGATGGTTCGGTTCCTACGGGCA--GCATGAACGCGGGCTTTGAAGACTGTAGC              | FS |      | 1/9  |
|        | GCGGCGCACGCGATGGTTCGGTTCCTACGCAACAGGCAGGCATGAACGCGGGCTTTGAAGACTGTAGC          | IF |      |      |
| C3-G4  | GCGGCGCACGCGATG-----GGCAGGGCATGAACGCGGGCTTTGAAGACTGTAGC                       | FS |      | 1/1  |
|        | GCGGCGCACGCGATGGTTCGGTTCCTACAGGAACGGAAACC--GCAGGGCATGAACGCGGGCTTTGAAGACTGTAGC | FS |      | 1/1  |
| C3-G6  | GCGGCGCACGCGATGGTTCGGTTCCTAC-----AGGGCATGAACGCGGGCTTTGAAGACTGTAGC             | FS |      | 1/1  |
|        | GCGGCGCACGCGATGGTTCGGTTCCTAC-TCAGGGGCGAAGCGGCAGGCATGAACGCGG                   | IF |      | 1/1  |
| C3-G7  | GCGGCGCACGCGATGGTTCGGTTCCTAC-GGCAGGGCATGAACGCGG                               | FS |      | 1/1  |
|        | GCGGCGCACGCGATGGTTCGGTTCCTA-----GGGCATGAACGCGG                                | IF |      | 1/1  |
| C3-G10 | GCGGCGCACGCGATGGTTCGGTTCCTACGAGGCAGGCATGAACGCGGGCTTTGAAGACTGTAGC*             | FS |      |      |
|        | GCGGCGCACGCGATGGTTCGGTTCCTAC-----AGGGCATGAACGCGGGCTTTGAAGACTGTAGC             | FS |      | 1/1  |
| C3-G13 | GCGGCGCACGCGATGGTTCGGTTCCTAC-----CAGGGCATGAACGCGGGCTTTGAAGACTGTAGC            | IF | 4/12 |      |
|        | GCGGCGCACGCGATGGTTCGGTTCCTA--GCAGGGCATGAACGCGGGCTTTGAAGACTGTAGC               | IF |      | 2/12 |
|        | GCGGCGCACGCGATGGTTCGGTTCCTC-----GGCAGGGCATGAACGCGGGCTTTGAAGACTGTAGC*          | IF |      | 2/12 |
| C3-G13 | GCGGCGCACGCGATGGTTCGGTTCCTACGAGGCAGGCATGAACGCGGGCTTTGAAGACTGTAGC*             | FS |      | 2/12 |
| C3-G16 | GCGGCGCACGCGATGGTTCGGTTCCTAC-----CAGGGCATGAACGCGGGCTTTGAAGACTGTAGC            | IF | 1/12 | 4/12 |
|        | GCGGCGCACGCGATGGTTCGGTTCCT-----GGCAGGGCATGAACGCGGGCTTTGAAGACTGTAGC            | IF |      | 5/12 |
|        | GCGGCGCACGCGATGGTTCGGTTCCTC-GGCAGGGCATGAACGCGGGCTTTGAAGACTGTAGC               | FS |      | 4/12 |
|        | GCGGCGCACGCGATGGGCAGAC-----CATGAACGCGGGCTTTGAAGACTGTAGC                       | FS |      | 5/12 |

gRNA target site; PAM; insertion; substitution; deletion; \*mutation appeared in multiple cages

++ : insertion sequence is from gRNA scaffold-U6-3'UTR

GGCGCACGCGATGGTTCGGTTCCTACGGGCGTTTGTAGAGCTAGAAATAGCAAGTTAAAATAAGGCTAGTCCGTTATCAACTTGAAAAGTGGCACCGAGTCGGTGCTTTTTT  
TGTGAAAATTTGATTCACCTTGTGTTTAGGAAAATAATACCTTCCTTTGAAACAGGTATTTACAATGATGGACGATAGAAAAAGACCACCTTAAAATGCTTTATTCAAGCT  
ATTGCTTCGATTCCTCATTGAGATCTAATCTCAAATTTGTGATTTAGAAAAACAGCGAATATTGTACTATAATAATTCCTTTGGTAATCTCAGGCTTTCAGTAATGAT  
AGAATCCTTAAGACTGTAAGAAATATAAAGTTTAAAAAAGGAAAACAGGTATATCAAATCAGAAAACAACAACAGCTCTTTTCCGTTGAATTCACCTGTACGATGGC  
TTAAGGATGAGCTGTAACGAAACCTTACAACAGCCACGCAGAACGGGATCCGGCAGGCATGAACGCG
