# Supplementary material for: Experimental population modification of the malaria vector mosquito, Anopheles stephensi
Source: PLoS Genet. 2019 Dec 19;15(12):e1008440. doi: 10.1371/journal.pgen.1008440 (PMC6922335; doi:10.1371/journal.pgen.1008440)
Supplement: S2 Table — (XLSX) [file pgen.1008440.s002.xlsx]

## Sheet: Sheet1
Table S2. Larval and adult phenotypes for non-drive release cage ND-Control-B
	Week	Week	Week	Week	Week	Week	Week	Week	Week	Week	TOTAL
	13	14	15	16	17	18	19	20	21	22
DsRed+ Larvae	0	0	0	0	0	0	0	0	0	0	0	3000
Wild-type Larvae	300	300	300	300	300	300	300	300	300	300	3000
DsRed+ Males	0	0	0	0	0	0	0	0	0	0	0	2746
Wild-type Males	132	119	144	109	105	149	129	136	137	122	1282
DsRed+ Females	0	0	0	0	0	0	0	0	0	0	0
Wild-type Females	151	135	144	178	137	139	149	153	146	132	1464
											% survival to adult: 92%
