# Supplementary material for: Experimental population modification of the malaria vector mosquito, Anopheles stephensi
Source: PLoS Genet. 2019 Dec 19;15(12):e1008440. doi: 10.1371/journal.pgen.1008440 (PMC6922335; doi:10.1371/journal.pgen.1008440)
Supplement: S4 Table — (XLSX) [file pgen.1008440.s004.xlsx]

## Sheet: Sheet1
Table S4. Larval and adult phenotypes for non-drive release cage ND-1:1-A.
	Week	Week	Week	Week	Week	Week	Week	Week	Week	Week	TOTAL
	13	14	15	16	17	18	19	20	21	22
DsRed+ Larvae	54 (18%)	25 (9%)	84 (28%)	92 (31%)	115 (38%)	163 (55%)	183 (61%)	158 (53%)	248 (83%)	142 (47%)	1264	2980
Wild-type Larvae	242 (82%)	263 (91%)	215 (72%)	206 (69%)	185 (62%)	136 (45%)	117 (39%)	142 (47%)	52 (17%)	158 (53%)	1716
DsRed+ Males	25 (9%)	10 (5%)	37 (14%)	44 (17%)	41 (16%)	64 (23%)	73 (28%)	69 (26%)	78 (39%)	63 (23%)	504	2528
Wild-type Males	114 (43%)	112 (53%)	108 (40%)	86 (33%)	86 (33%)	70 (26%)	45 (18%)	58 (22%)	25 (13%)	71 (26%)	775
DsRed+ Females	20 (8%)	9 (4%)	27 (10%)	33 (13%)	53 (21%)	88 (32%)	82 (32%)	72 (28%)	74 (37%)	68 (25%)	527
Wild-type Females	107 (40%)	81 (38%)	95 (36%)	96 (37%)	78 (30%)	51 (19%)	57 (22%)	65 (25%)	23 (12%)	69 (25%)	722
No significant difference between the larval-to-adult survival percentage of DsRed+ and DsRed- mosquitoes (both sexes) across all generations (ttest, p=0.11, n=20)											% survival to adult: 85%
