# Supplementary material for: Experimental population modification of the malaria vector mosquito, Anopheles stephensi
Source: PLoS Genet. 2019 Dec 19;15(12):e1008440. doi: 10.1371/journal.pgen.1008440 (PMC6922335; doi:10.1371/journal.pgen.1008440)
Supplement: S7 Table — (XLSX) [file pgen.1008440.s007.xlsx]

## Sheet: Sheet1
Table S7. Larval and adult phenotypes for non-drive release cage ND-10:1-A
	Week	Week	Week	Week	Week	Week	Week	Week	Week	Week	TOTAL
	13	14	15	16	17	18	19	20	21	22
DsRed+ Larvae	50 (17%)	155 (52$)	203 (68%)	238 (79%)	296 (87%)	224 (75%)	277 (93%)	285 (95%)	282 (94%)	286 (95%)	2296	3031
Wild-type Larvae	249 (83%)	141 (48%)	95 (32%)	62 (21%)	44 (13%)	76 (25%)	21 (7%)	15 (5%)	18 (6%)	14 (5%)	735
DsRed+ Males	14 (5%)	52 (23%)	84 (37%)	96 (39%)	138 (57%)	105 (39%)	124 (48%)	108 (46%)	79 (50%)	107 (46%)	907	2368
Wild-type Males	126 (47%)	53 (23%)	41 (18%)	22 (9%)	2 (1%)	30 (11%)	10 (4%)	7 (3%)	6 (4%)	7 (3%)	304
DsRed+ Females	30 (11%)	64 (28%)	52 (23%)	106 (43%)	99 (41%)	105 (39%)	118 (45%)	117 (49%)	60 (38%)	112 (48%)	863
Wild-type Females	99 (37%)	59 (26%)	50 (22%)	22 (9%)	2 (1%)	32 (12%)	8 (3%)	5 (2%)	12 (8%)	5 (2%)	294
No significant difference between the larval-to-adult survival percentage of DsRed+ and DsRed- mosquitoes (both sexes) across all generations (ttest, p=0.98, n=20)											% survival to adult: 78%
