# Supplementary material for: Experimental population modification of the malaria vector mosquito, Anopheles stephensi
Source: PLoS Genet. 2019 Dec 19;15(12):e1008440. doi: 10.1371/journal.pgen.1008440 (PMC6922335; doi:10.1371/journal.pgen.1008440)
Supplement: S11 Table — (XLSX) [file pgen.1008440.s011.xlsx]

## Sheet: Sheet1
Table S11. Larval and adult phenotypes for overlapping gene-drive cage OD-1:1-B
	Generation	Generation	Generation	Generation	Generation	Generation	Generation	TOTAL
	1	2	3	4	5	6	7
DsRed+ Larvae	154 (51%)	225 (76%)	285 (94%)	276 (92%)	296 (99%)	300 (100%)	-	1536	1801
Wild-type Larvae	146 (49%)	73 (24%)	18 (6%)	24 (8%)	4 (1%)	0	-	265
DsRed+ Males	76 (28%)	90 (37%)	-	102 (45%)	141 (48%)	152 (52%)	-	561	1327
Wild-type Males	63 (23%)	32 (13%)	-	12 (5%)	1 (0.3%)	0	-	108
DsRed+ Females	66 (24%)	93 (38%)	-	100 (44%)	149 (51%)	138 (48%)	-	546
Wild-type Females	69 (25%)	29 (12%)	-	11 (5%)	3 (1%)	0	-	112
No significant difference between the larval-to-adult survival percentage of DsRed+ and DsRed- mosquitoes (both sexes) across all generation (ttest, p=0.53, n=9)								% survival to adult: 74%
