# Supplementary material for: Experimental population modification of the malaria vector mosquito, Anopheles stephensi
Source: PLoS Genet. 2019 Dec 19;15(12):e1008440. doi: 10.1371/journal.pgen.1008440 (PMC6922335; doi:10.1371/journal.pgen.1008440)
Supplement: S14 Table — (XLSX) [file pgen.1008440.s014.xlsx]

## Sheet: Sheet1
Table S14. Larval and adult phenotypes for overlapping gene-drive cage OD-0.1:1-A, 0.1:1 transgenic:wild-type male release ratio.
	Generation	Generation	Generation	Generation	Generation	Generation	Generation	TOTAL
	1	2	3	4	5	6	7
DsRed+ Larvae	13 (4%)	4 (1%)	17 (6%)	14 (5%)	0	0	-	48	1800
Wild-type Larvae	287 (96%)	296 (99%)	283 (94%)	286 (95%)	300 (100%)	300 (100%)	-	1752
DsRed+ Males	8 (3%)	2 (1%)	3 (1%)	4 (2%)	0	0	-	17	1542
Wild-type Males	102 (38%)	110 (43%)	105 (43%)	107 (46%)	126 (46%)	131 (49%)	-	681
DsRed+ Females	5 (2%)	2 (1%)	12 (5%)	6 (3%)	0	0	-	25
Wild-type Females	153 (57%)	142 (55%)	122 (50%)	118 (50%)	148 (54%)	136 (51%)	-	819
No significant difference between the larval-to-adult survival percentage of DsRed+ and DsRed- mosquitoes (both sexes) across all generation (ttest, p=0.48, n=10)								% survival to adult: 86%
