# Supplementary material for: Experimental population modification of the malaria vector mosquito, Anopheles stephensi
Source: PLoS Genet. 2019 Dec 19;15(12):e1008440. doi: 10.1371/journal.pgen.1008440 (PMC6922335; doi:10.1371/journal.pgen.1008440)
Supplement: S16 Table — (XLSX) [file pgen.1008440.s016.xlsx]

## Sheet: Sheet1
Table S16. Larval and adult phenotypes for overlapping gene-drive cage OD-0.1:1-C, 0.1:1 transgenic:wild-type male release ratio.
	Generation	Generation	Generation	Generation	Generation	Generation	Generation	TOTAL
	1	2	3	4	5	6	7
DsRed+ Larvae	0	0	0	-	-	-	-	0	900
Wild-type Larvae	300 (100%)	300 (100%)	300 (100%)	-	-	-	-	900
DsRed+ Males	0	0	-	-	-	-	-	0	529
Wild-type Males	114 (45%)	143 (52%)	-	-	-	-	-	257
DsRed+ Females	0	0	-	-	-	-	-	0
Wild-type Females	142 (55%)	130 (48%)	-	-	-	-	-	272
								% survival to adult: 59%
